# Supplementary material for: Leber’s Hereditary Optic Neuropathy with Mitochondrial DNA Mutation G11778A: A Systematic Literature Review and Meta‐Analysis
Source: Hindawi journal article supplement (doi:10.1155/2023/1107866), 2023-01-01

### Supplementary 3:

#### a) Risk of bias table – case series

|                           | Clear inclusion criteria | Condition measured in a standard, reliable way | Valid method for patient identification | Consecutive participants inclusion | Complete inclusion of patients | Clear demographic information reporting | Clear clinical information reporting | Clear outcomes or follow-up results reporting | Clear presenting site(s)/clinic(s) demographic information reporting | Appropriate statistics used |
|---------------------------|--------------------------|------------------------------------------------|-----------------------------------------|------------------------------------|--------------------------------|-----------------------------------------|--------------------------------------|-----------------------------------------------|----------------------------------------------------------------------|-----------------------------|
| Chuenkongkaew, W. L. 2005 | High risk                | Low risk                                       | Unclear                                 | Unclear                            | High risk                      | High risk                               | Low risk                             | Unclear                                       | High risk                                                            | Low risk                    |
| Cui, G. 2013              | Unclear                  | Low risk                                       | Low risk                                | Low risk                           | Unclear                        | High risk                               | Low risk                             | Low risk                                      | Low risk                                                             | Low risk                    |
| Dimitriadis, K. 2014      | High risk                | Low risk                                       | Unclear                                 | Unclear                            | Unclear                        | Low risk                                | Low risk                             | Low risk                                      | Unclear                                                              | Low risk                    |
| Du, W. D. 2011            | Low risk                 | Low risk                                       | Low risk                                | Low risk                           | Unclear                        | High risk                               | Low risk                             | Low risk                                      | Low risk                                                             | Not applicable              |
| Guy, J. 2014              | High risk                | Low risk                                       | High risk                               | High risk                          | Unclear                        | Low risk                                | Low risk                             | Low risk                                      | Unclear                                                              | Low risk                    |
| Ji, Y. 2008               | High risk                | Low risk                                       | Unclear                                 | Unclear                            | Unclear                        | High risk                               | Low risk                             | Low risk                                      | Low risk                                                             | Not applicable              |
| Jiang, P. 2015            | High risk                | Low risk                                       | Unclear                                 | Unclear                            | Low risk                       | Low risk                                | Low risk                             | Low risk                                      | High risk                                                            | Low risk                    |
| Khan, N. A. 2017          | Low risk                 | Low risk                                       | Low risk                                | Low risk                           | Unclear                        | Low risk                                | Low risk                             | Low risk                                      | Low risk                                                             | Low risk                    |
| Kim, J. Y. 2003           | Low risk                 | Low risk                                       | Low risk                                | Unclear                            | Unclear                        | High risk                               | Low risk                             | Low risk                                      | Unclear                                                              | Unclear                     |
| Kirkman, M. A. 2009       | High risk                | Low risk                                       | Low risk                                | Unclear                            | Unclear                        | Low risk                                | Low risk                             | Low risk                                      | Low risk                                                             | Low risk                    |
| Lam, B. L. 2014           | High risk                | Low risk                                       | High risk                               | Low risk                           | Unclear                        | Low risk                                | Low risk                             | Low risk                                      | High risk                                                            | Low risk                    |
| Lu, Q. 2017               | Low risk                 | Low risk                                       | Low risk                                | High risk                          | High risk                      | Low risk                                | Low risk                             | Low risk                                      | Low risk                                                             | Not applicable              |
| Majander, A. 2017         | Low risk                 | Low risk                                       | Low risk                                | Unclear                            | Low risk                       | Low risk                                | Low risk                             | Low risk                                      | Low risk                                                             | Low risk                    |
| Mashima, Y. 2017          | High risk                | Low risk                                       | Low risk                                | Low risk                           | Unclear                        | Low risk                                | Low risk                             | Low risk                                      | Low risk                                                             | Low risk                    |
| Mishra, A. 2017           | High risk                | Low risk                                       | Low risk                                | Low risk                           | Low risk                       | Low risk                                | Low risk                             | Low risk                                      | Low risk                                                             | Not applicable              |
| Qiao, C. 2015             | High risk                | Low risk                                       | High risk                               | High risk                          | High risk                      | Low risk                                | Low risk                             | Low risk                                      | High risk                                                            | High risk                   |
| Ramos Cdo, V. 2009        | Low risk                 | Low risk                                       | Low risk                                | Low risk                           | Low risk                       | Low risk                                | Low risk                             | Low risk                                      | Low risk                                                             | Low risk                    |
| Sadun, A. A. 2002         | Low risk                 | Low risk                                       | Low risk                                | Low risk                           | Low risk                       | Low risk                                | Low risk                             | Low risk                                      | Low risk                                                             | Low risk                    |
| Sadun, A. A. 2003         | Low risk                 | Low risk                                       | Low risk                                | Low risk                           | Low risk                       | Low risk                                | Low risk                             | Low risk                                      | Low risk                                                             | Low risk                    |
| Sadun, F. 2004            | Low risk                 | Low risk                                       | Low risk                                | Low risk                           | Low risk                       | Low risk                                | Low risk                             | Low risk                                      | Low risk                                                             | Unclear                     |
| Sadun, A. A. 2006         | Low risk                 | Low risk                                       | Low risk                                | Low risk                           | Low risk                       | Low risk                                | Low risk                             | Low risk                                      | Low risk                                                             | Unclear                     |
| Spruijt, L. 2006          | Unclear                  | Unclear                                        | Low risk                                | High risk                          | High risk                      | Low risk                                | Low risk                             | Low risk                                      | Low risk                                                             | Low risk                    |
| Marotta, R. 2020          | Low risk                 | Low risk                                       | High risk                               | Low risk                           | Low risk                       | Low risk                                | Low risk                             | Low risk                                      | Low risk                                                             | Low risk                    |
| Tonagel, F. 2021          | Low risk                 | Unclear                                        | Unclear                                 | Low risk                           | Low risk                       | Low risk                                | Low risk                             | Low risk                                      | Low risk                                                             | Unclear                     |
| Ahn, Y. J. 2020           | Low risk                 | Low risk                                       | Low risk                                | Unclear                            | Unclear                        | Low risk                                | Low risk                             | Low risk                                      | Low risk                                                             | Low risk                    |
| Poincenot, L. 2020        | Low risk                 | High risk                                      | High risk                               | Unclear                            | Unclear                        | Low risk                                | Low risk                             | Low risk                                      | Low risk                                                             | Low risk                    |
| Cui, S. 2019              | Low risk                 | Low risk                                       | Low risk                                | High risk                          | High risk                      | Low risk                                | Low risk                             | Low risk                                      | Low risk                                                             | Low risk                    |
| Dokrungekoon, T. 2019     | Low risk                 | Low risk                                       | Low risk                                | Unclear                            | Unclear                        | High risk                               | Low risk                             | Low risk                                      | Low risk                                                             | Low risk                    |
| Liu, H. L. 2019           | Low risk                 | Low risk                                       | Unclear                                 | Unclear                            | Unclear                        | Low risk                                | Low risk                             | Low risk                                      | High risk                                                            | Low risk                    |
| Zhao, X. 2020             | Low risk                 | Low risk                                       | Low risk                                | Low risk                           | Low risk                       | High risk                               | Low risk                             | Low risk                                      | Low risk                                                             | Low risk                    |
| Li, J. K. 2020            | Low risk                 | Low risk                                       | Low risk                                | Unclear                            | Unclear                        | Low risk                                | Low risk                             | Low risk                                      | Low risk                                                             | Low risk                    |

 = Low risk    
  = High risk    
  = Unclear    
  = Not applicable

**b) Risk of bias table – Studies reporting prevalence data**

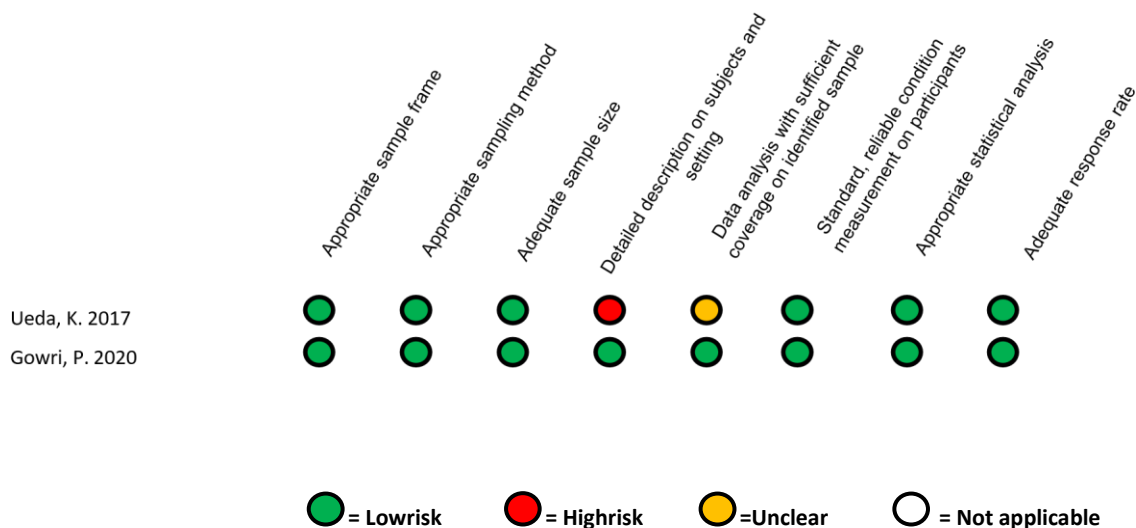

**c) Risk of bias table – non-randomized clinical trials**

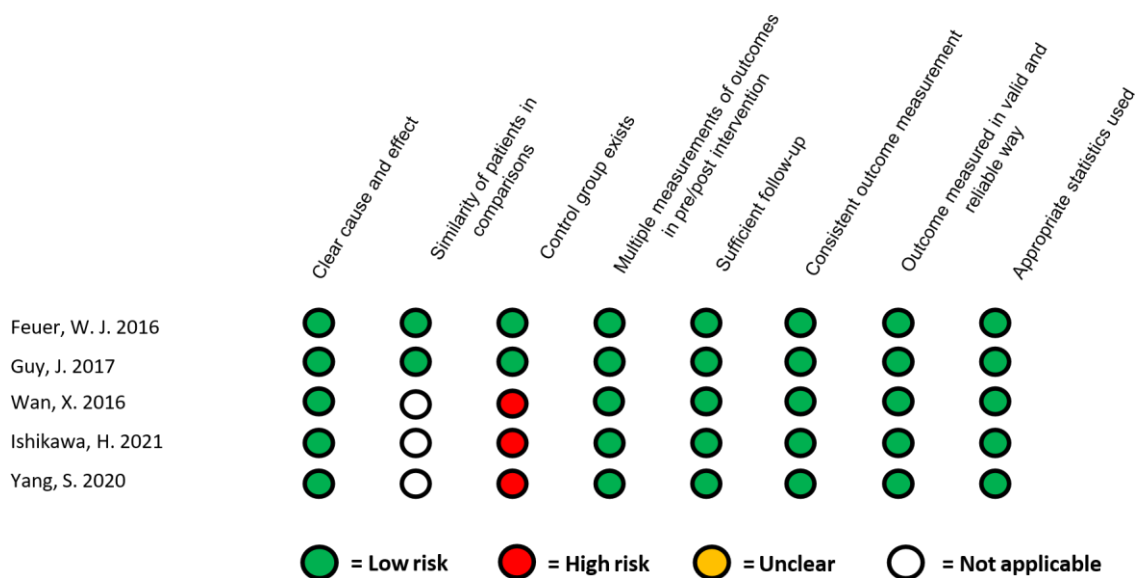

**d) Risk of bias table – Randomized-control trial**

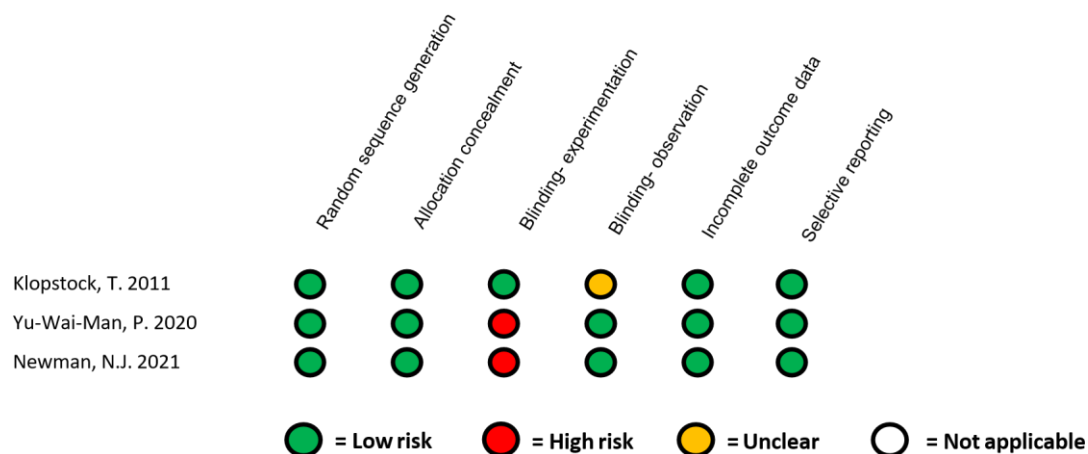

Supplement: f6 [file 1107866.f6.pdf]
