# Supplementary material for: Leber’s Hereditary Optic Neuropathy with Mitochondrial DNA Mutation G11778A: A Systematic Literature Review and Meta‐Analysis
Source: Hindawi journal article supplement (doi:10.1155/2023/1107866), 2023-01-01
Supplement: f5 [file 1107866.f5.pdf]

**Supplementary 2. Evaluation questions for title and abstract screening.**

| Domain             | Question                                                                                                                                                                                               | Evaluation Guideline |         |         |
|--------------------|--------------------------------------------------------------------------------------------------------------------------------------------------------------------------------------------------------|----------------------|---------|---------|
|                    |                                                                                                                                                                                                        | Yes                  | No      | Unclear |
| Research Design    | Do the title and abstract of the article describe an epidemiological study?                                                                                                                            | Include              | Exclude | Include |
| Publication Source | Do the title and abstract of the article come from a published study?                                                                                                                                  | Include              | Exclude | Include |
| Publication Type   | Is the published study not a non-target mutation (non-G11778A) study, non-human study, basic research study (e.g. genetics), traditional Chinese medicine study, review study, case report, or thesis? | Include              | Exclude | Include |
| Population         | Does the population of interest include patients with Leber hereditary optic neuropathy and with G11778A mutation?                                                                                     | Include              | Exclude | Include |
