# Supplementary material for: Leber’s Hereditary Optic Neuropathy with Mitochondrial DNA Mutation G11778A: A Systematic Literature Review and Meta‐Analysis
Source: Hindawi journal article supplement (doi:10.1155/2023/1107866), 2023-01-01
Supplement: f7 [file 1107866.f7.zip]

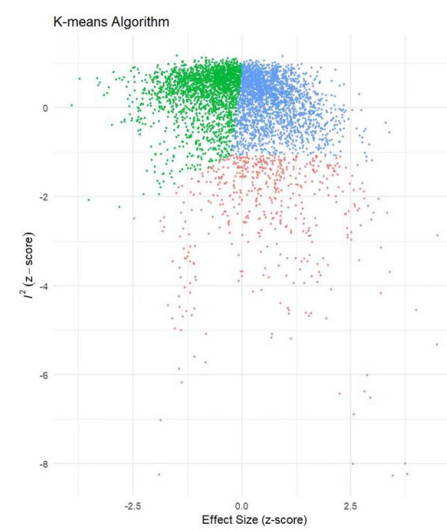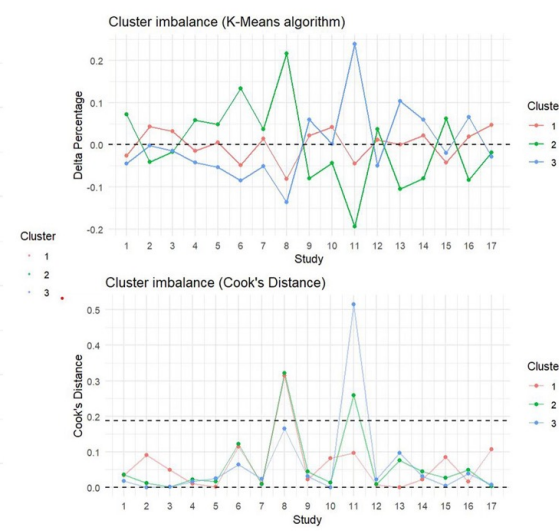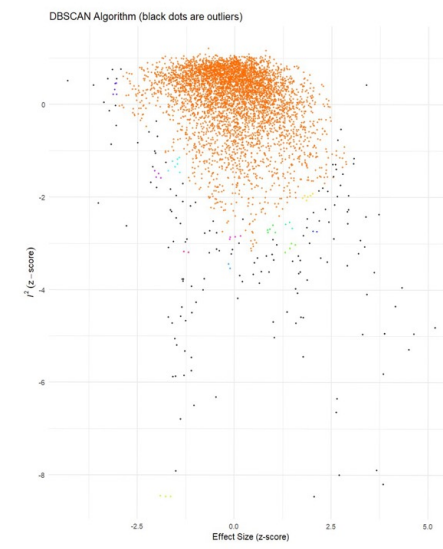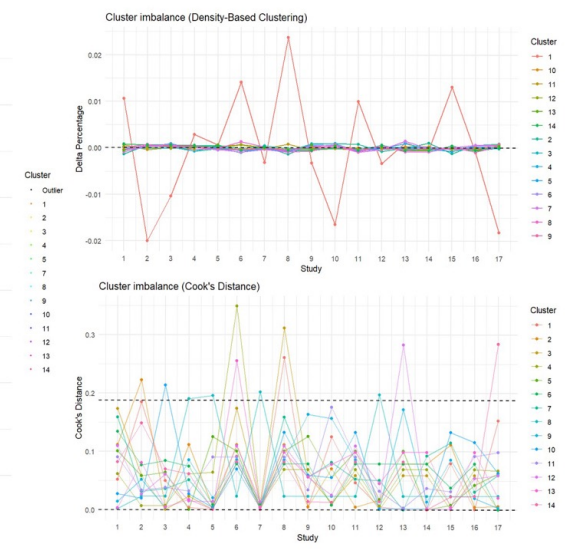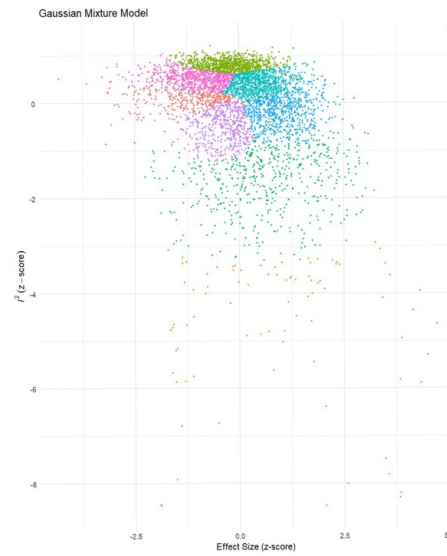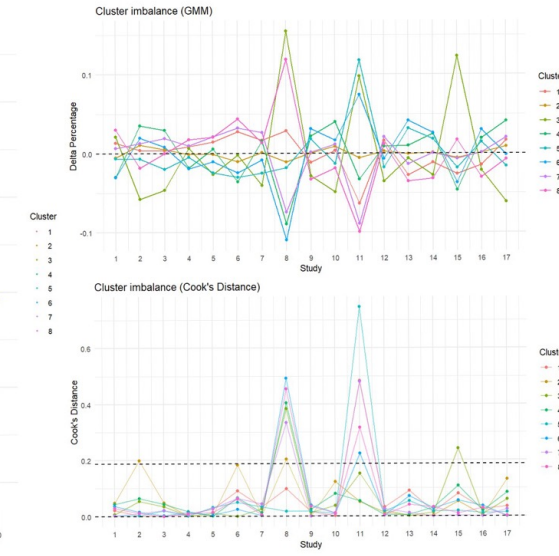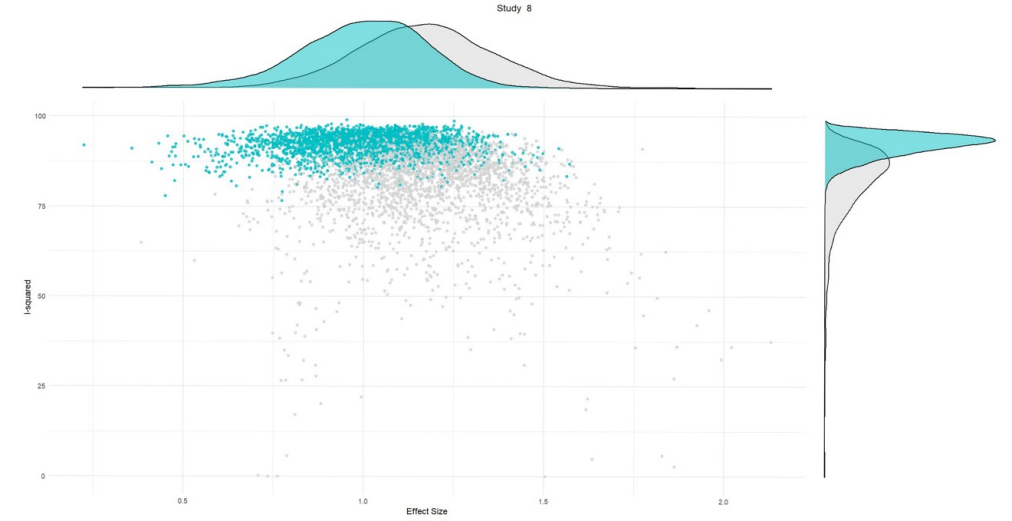

Spruijt et al. 2006

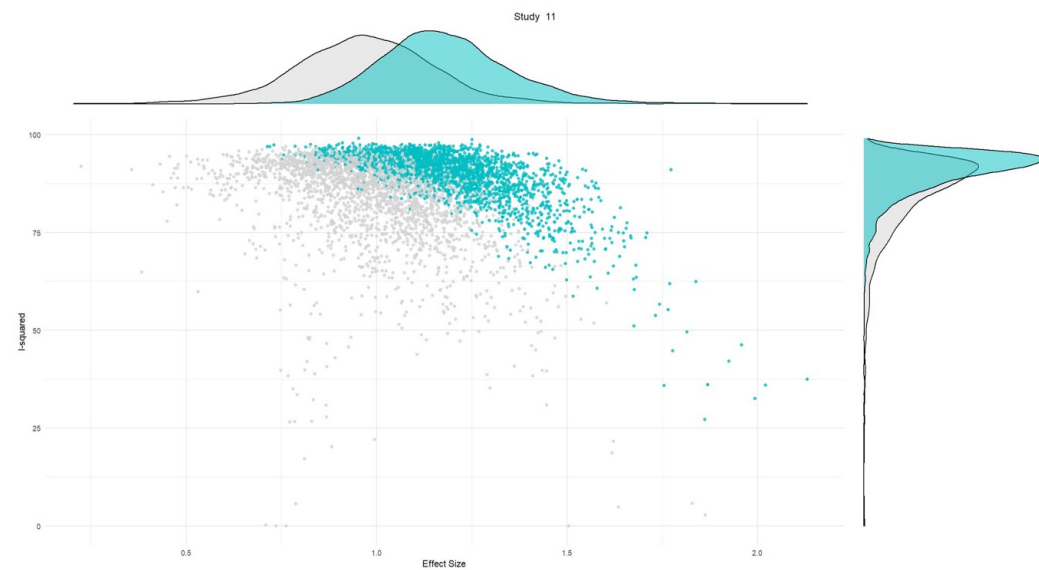

Ishikawa et al. 2021

**Supplementary4-C. Potential outliers identified from K-means clustering, DBSCAN, and Gaussian mixture models in studies reporting G11778A mutation rate among 3 primary LHON mutations.**
