# Supplementary material for: Leber’s Hereditary Optic Neuropathy with Mitochondrial DNA Mutation G11778A: A Systematic Literature Review and Meta‐Analysis
Source: Hindawi journal article supplement (doi:10.1155/2023/1107866), 2023-01-01
Supplement: f10 [file 1107866.f10.zip]

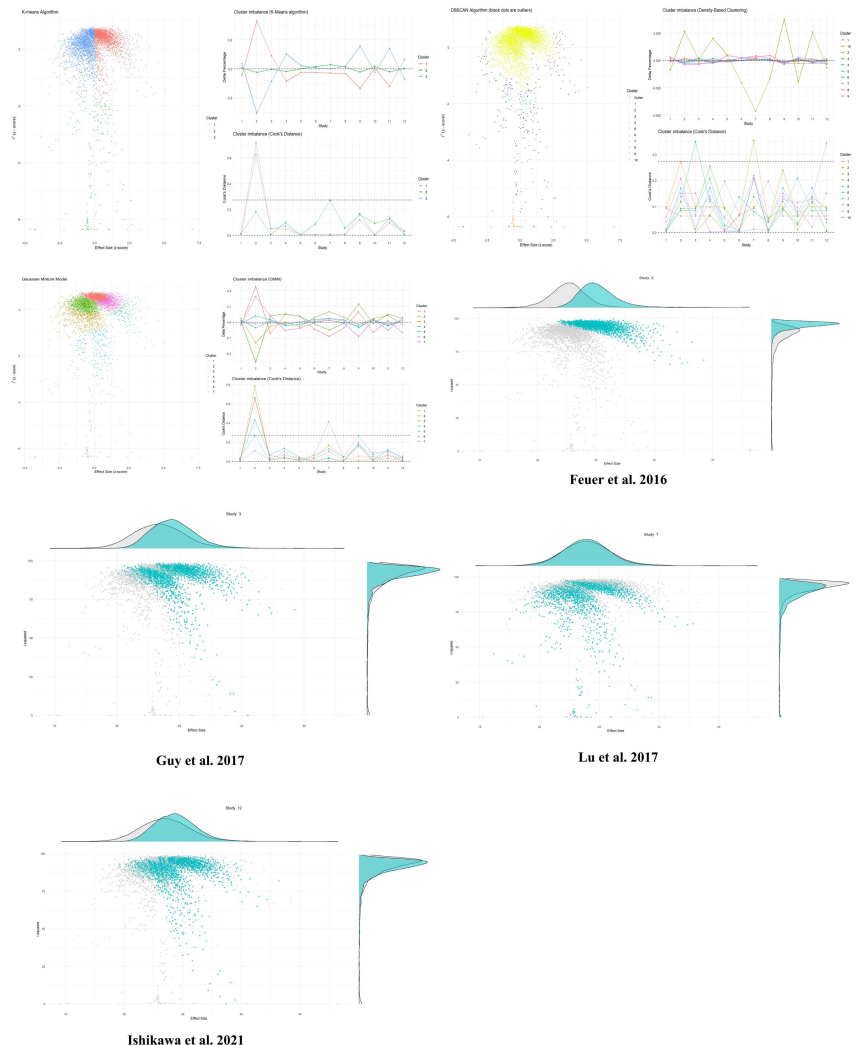

**Supplementary 7-C. Potential outliers identified from K-means clustering, DBSCAN, and Gaussian mixture models in studies reporting onset age of G11778A LHON patients.**
