# Supplementary material for: Leber’s Hereditary Optic Neuropathy with Mitochondrial DNA Mutation G11778A: A Systematic Literature Review and Meta‐Analysis
Source: Hindawi journal article supplement (doi:10.1155/2023/1107866), 2023-01-01

| Study | Sample Size | Visual Acuity (LogMAR) | CI | Weight |
|-------|-------------|------------------------|----|--------|
|-------|-------------|------------------------|----|--------|

|                   |     |      |              |       |
|-------------------|-----|------|--------------|-------|
| Jiang, P. 2015    | 120 | 1.30 | [1.13; 1.47] | 11.5% |
| Lam, B. L. 2014   | 44  | 1.40 | [1.29; 1.51] | 11.9% |
| Lu, Q. 2017       | 7   | 0.92 | [0.58; 1.25] | 10.0% |
| Majander, A. 2017 | 13  | 0.88 | [0.41; 1.35] | 8.5%  |
| Qiao, C. 2015     | 4   | 1.60 | [1.21; 1.99] | 9.4%  |
| Sadun, F. 2004    | 20  | 2.05 | [1.80; 2.29] | 10.9% |
| Wan, X. 2016      | 9   | 1.69 | [1.41; 1.97] | 10.5% |
| Tonagel, F. 2021  | 7   | 0.85 | [0.09; 1.62] | 5.7%  |
| Ishikawa, H. 2021 | 54  | 1.42 | [1.27; 1.58] | 11.6% |
| Cui, S. 2019      | 55  | 1.87 | [1.54; 2.19] | 10.1% |

**Random effects model**

Heterogeneity:  $I^2 = 84\%$ ,  $\tau^2 = 0.1353$ ,  $\chi^2_9 = 54.59$  ( $p < 0.01$ )

**1.44 [1.18; 1.69] 100.0%**

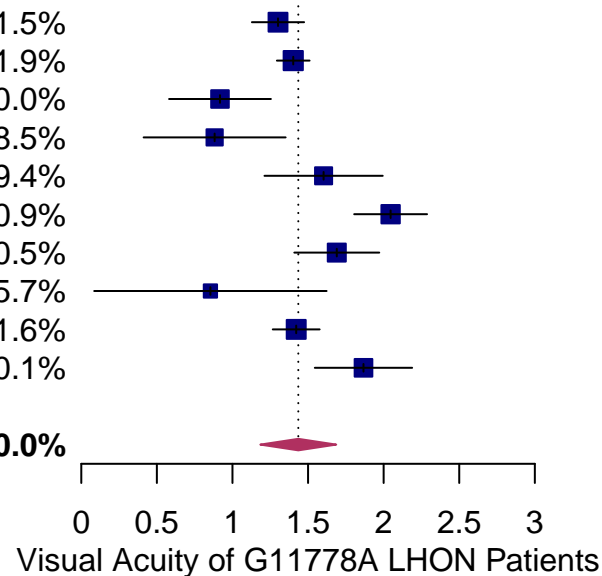

Supplement: f11 [file 1107866.f11.zip]
