# Supplementary material for: Leber's Hereditary Optic Neuropathy with Mitochondrial DNA Mutation G11778A: A Systematic Literature Review and Meta-Analysis
Source: Biomed Res Int. 2023 Jan 24;2023:1107866. doi: 10.1155/2023/1107866 (PMC9893526; doi:10.1155/2023/1107866)
Supplement: Supplementary 10 — S. Figure 7-A: forest plot of onset age of G11778A LHON patients. S. Figure 7-B: leave-one-out analysis of studies reporting onset age of G11778A LHON patients. S. Figure 7-C: potential outliers identified from K-means clustering, DBSCAN, and Gaussian mixture models in studies reporting onset age of G11778A LHON patients. S. Figure 7-D: the Baujat plot of the influence of remaining studies reporting onset age of G11778A LHON patients after excluding potential outliers identified previously by K-means clustering, DBSCAN, and Gaussian mixture models. [file 1107866.f10.zip]

Archive with 4 entries (4 files):
- S. Figure 7-A_SuppInfo.pdf
- S. Figure 7-B_SuppInfo.pdf
- S. Figure 7-D_SuppInfo.pdf
- Supplementary 7-C_SuppInfo.pdf
