# Supplementary figures and images for: Leber’s Hereditary Optic Neuropathy with Mitochondrial DNA Mutation G11778A: A Systematic Literature Review and Meta‐Analysis
Source: Hindawi journal article supplement (doi:10.1155/2023/1107866), 2023-01-01

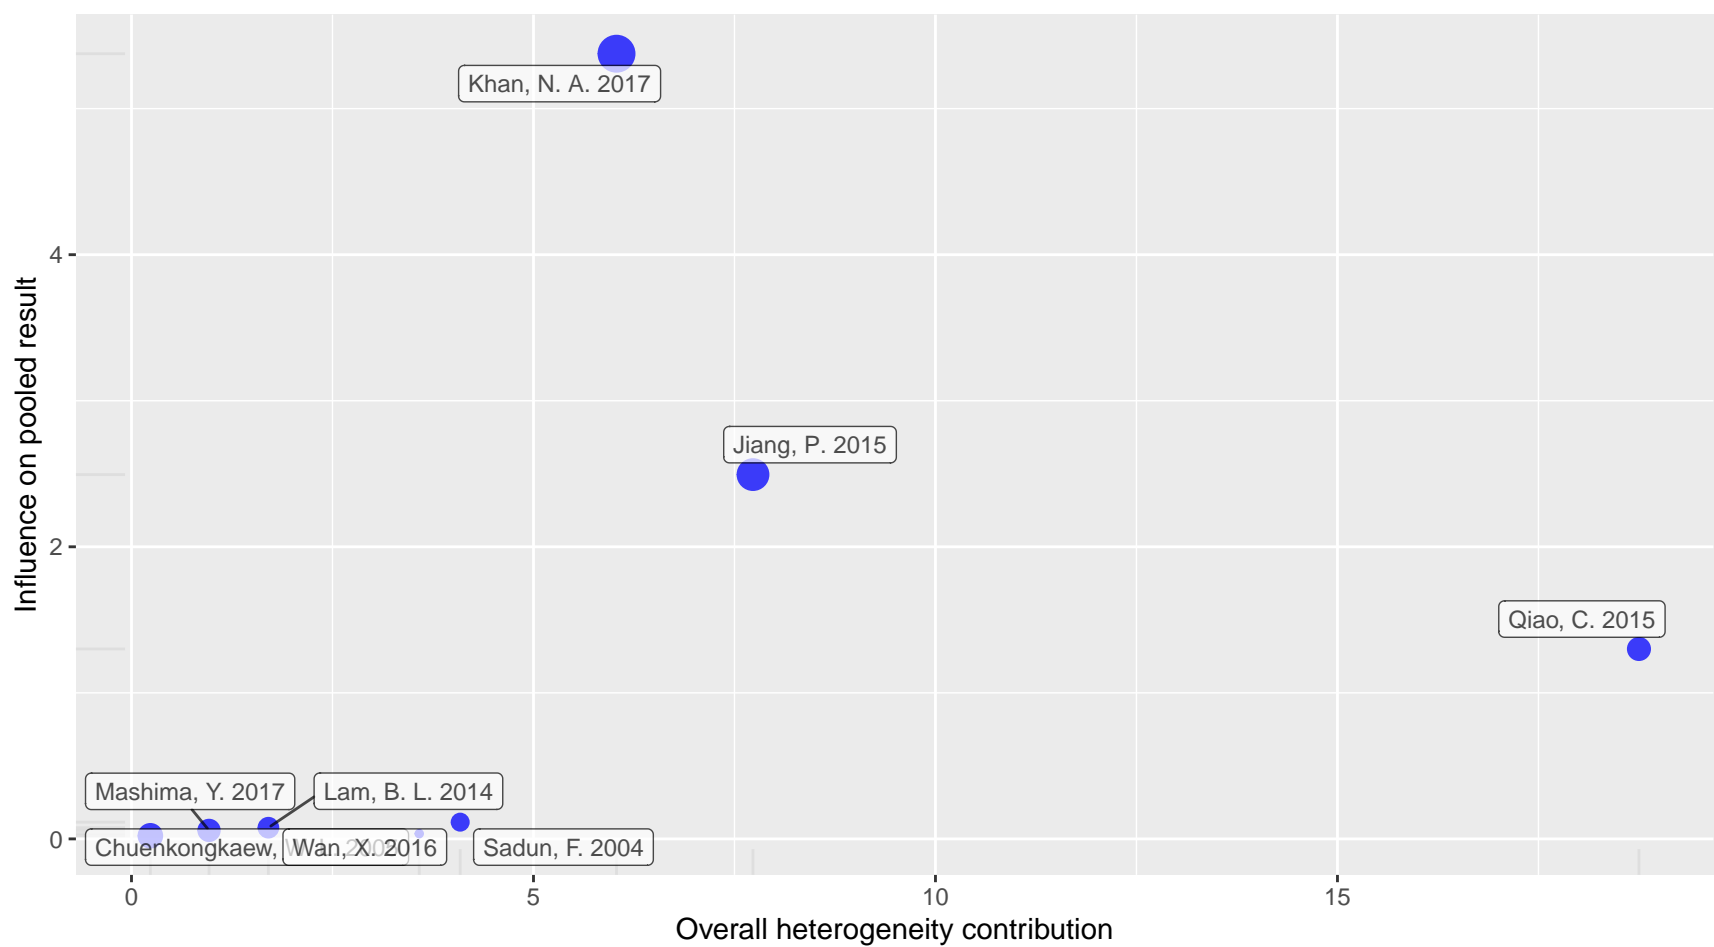

Supplement: f10 [file 1107866.f10.zip]

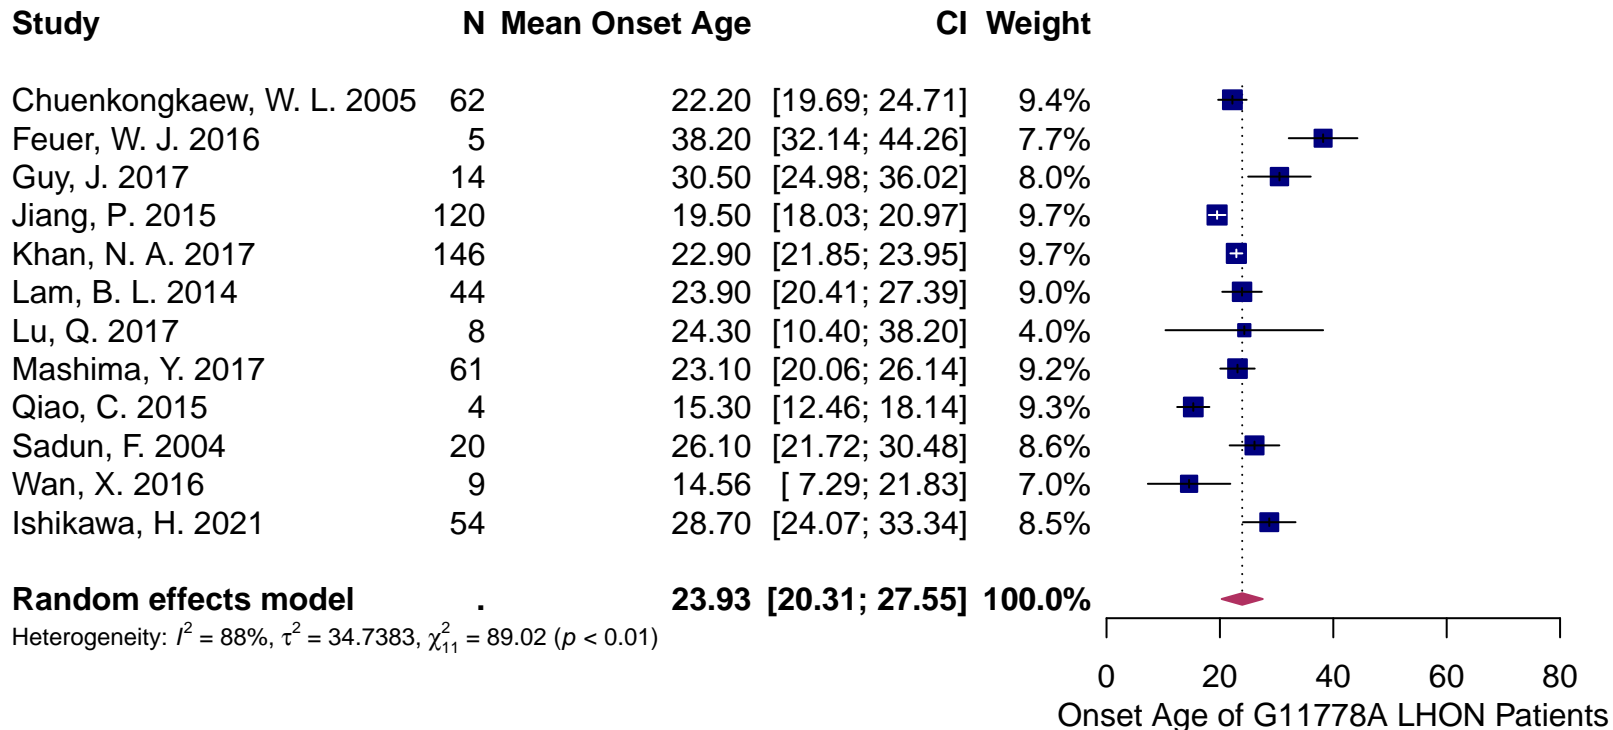

Supplement: f10 [file 1107866.f10.zip]

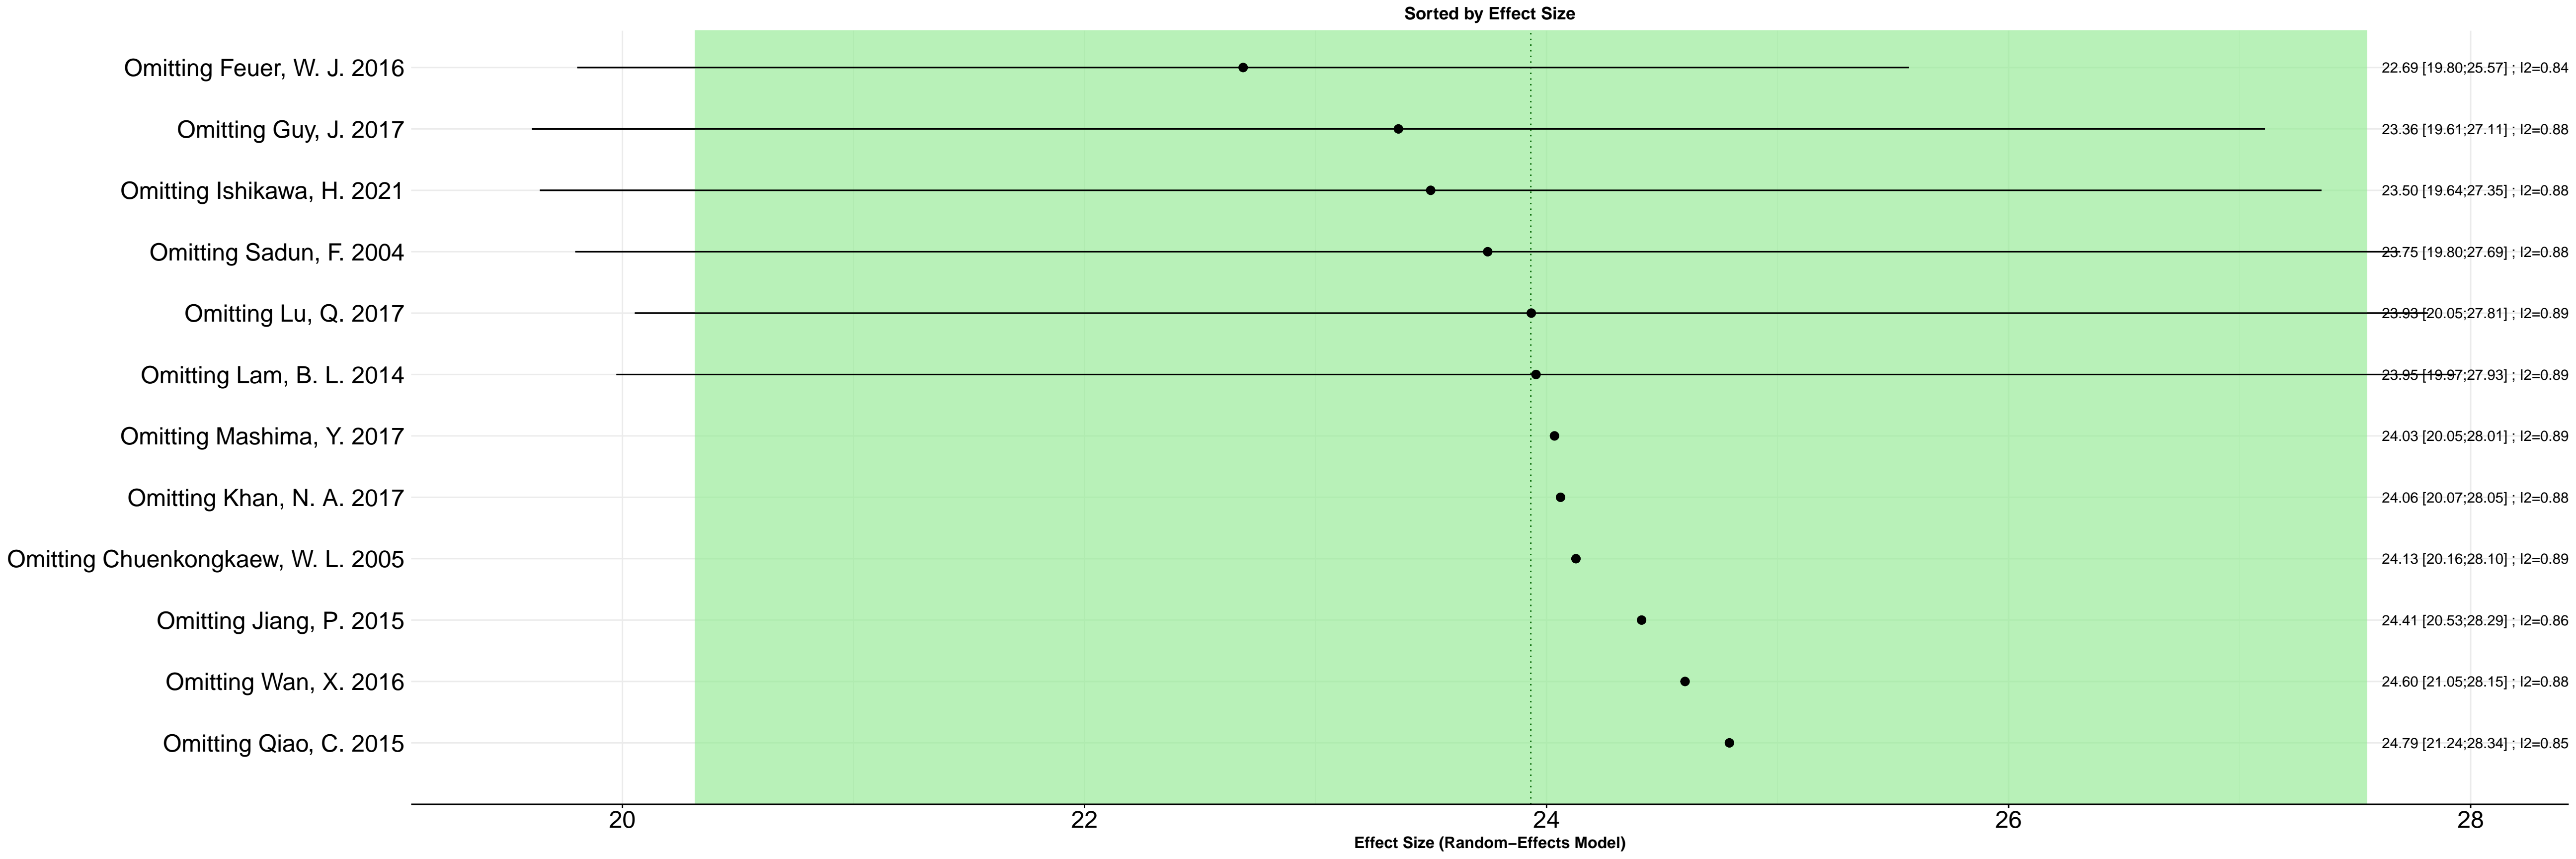

Supplement: f10 [file 1107866.f10.zip]

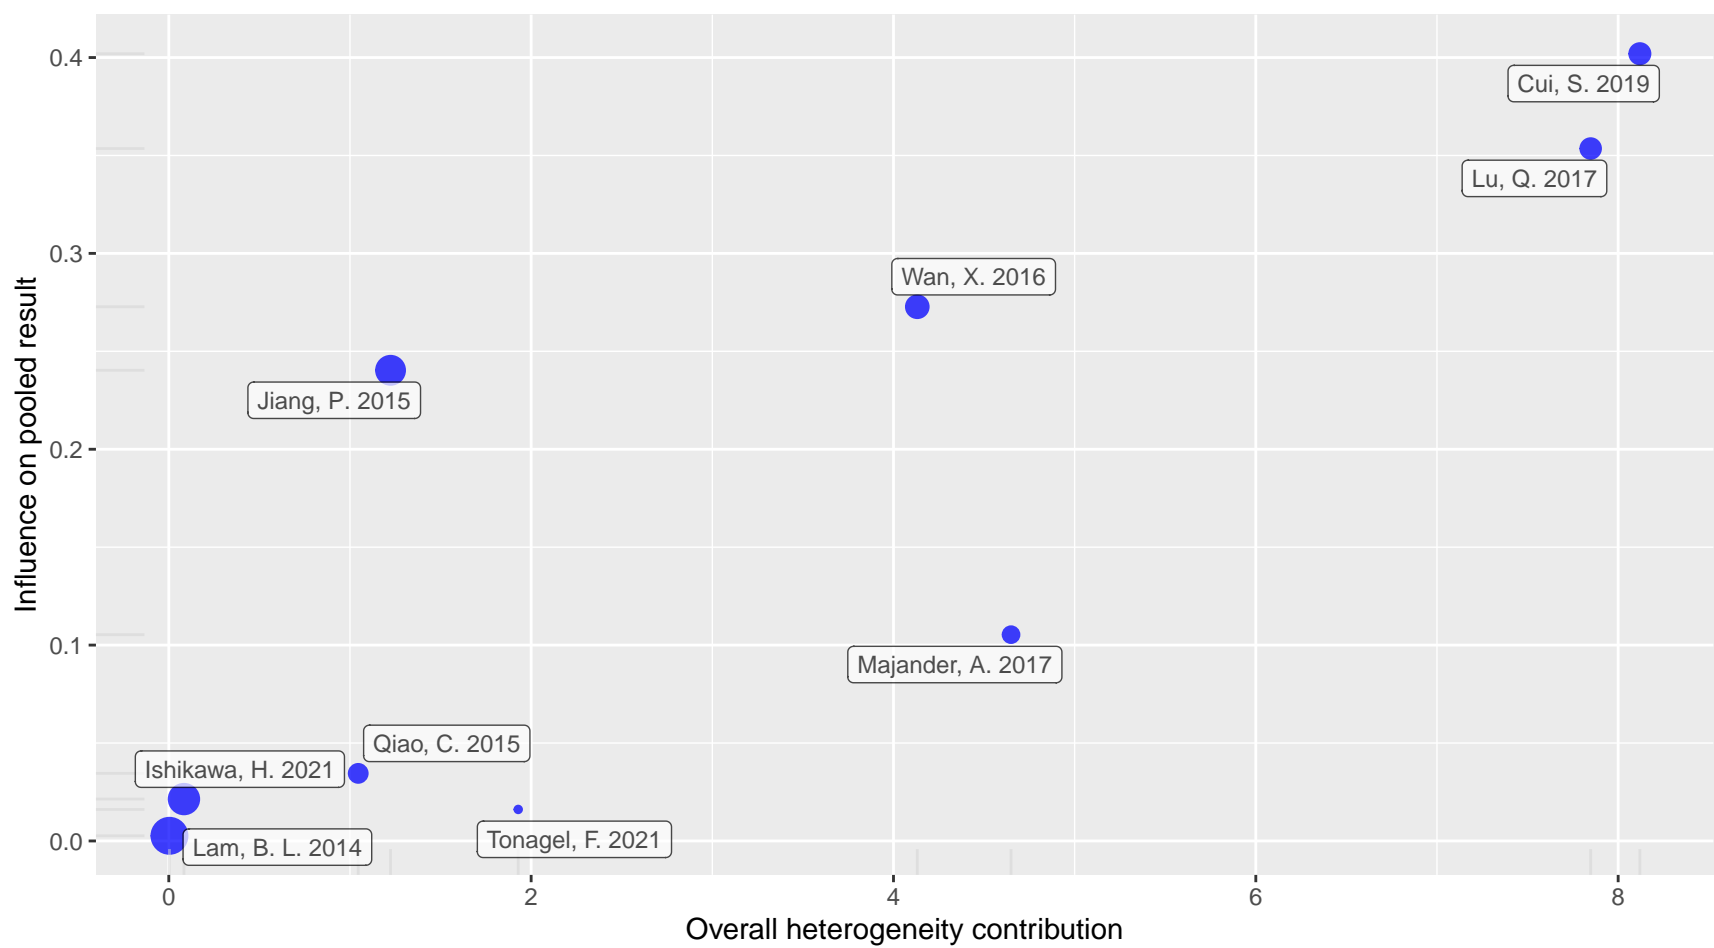

Supplement: f11 [file 1107866.f11.zip]

Sorted by Effect Size

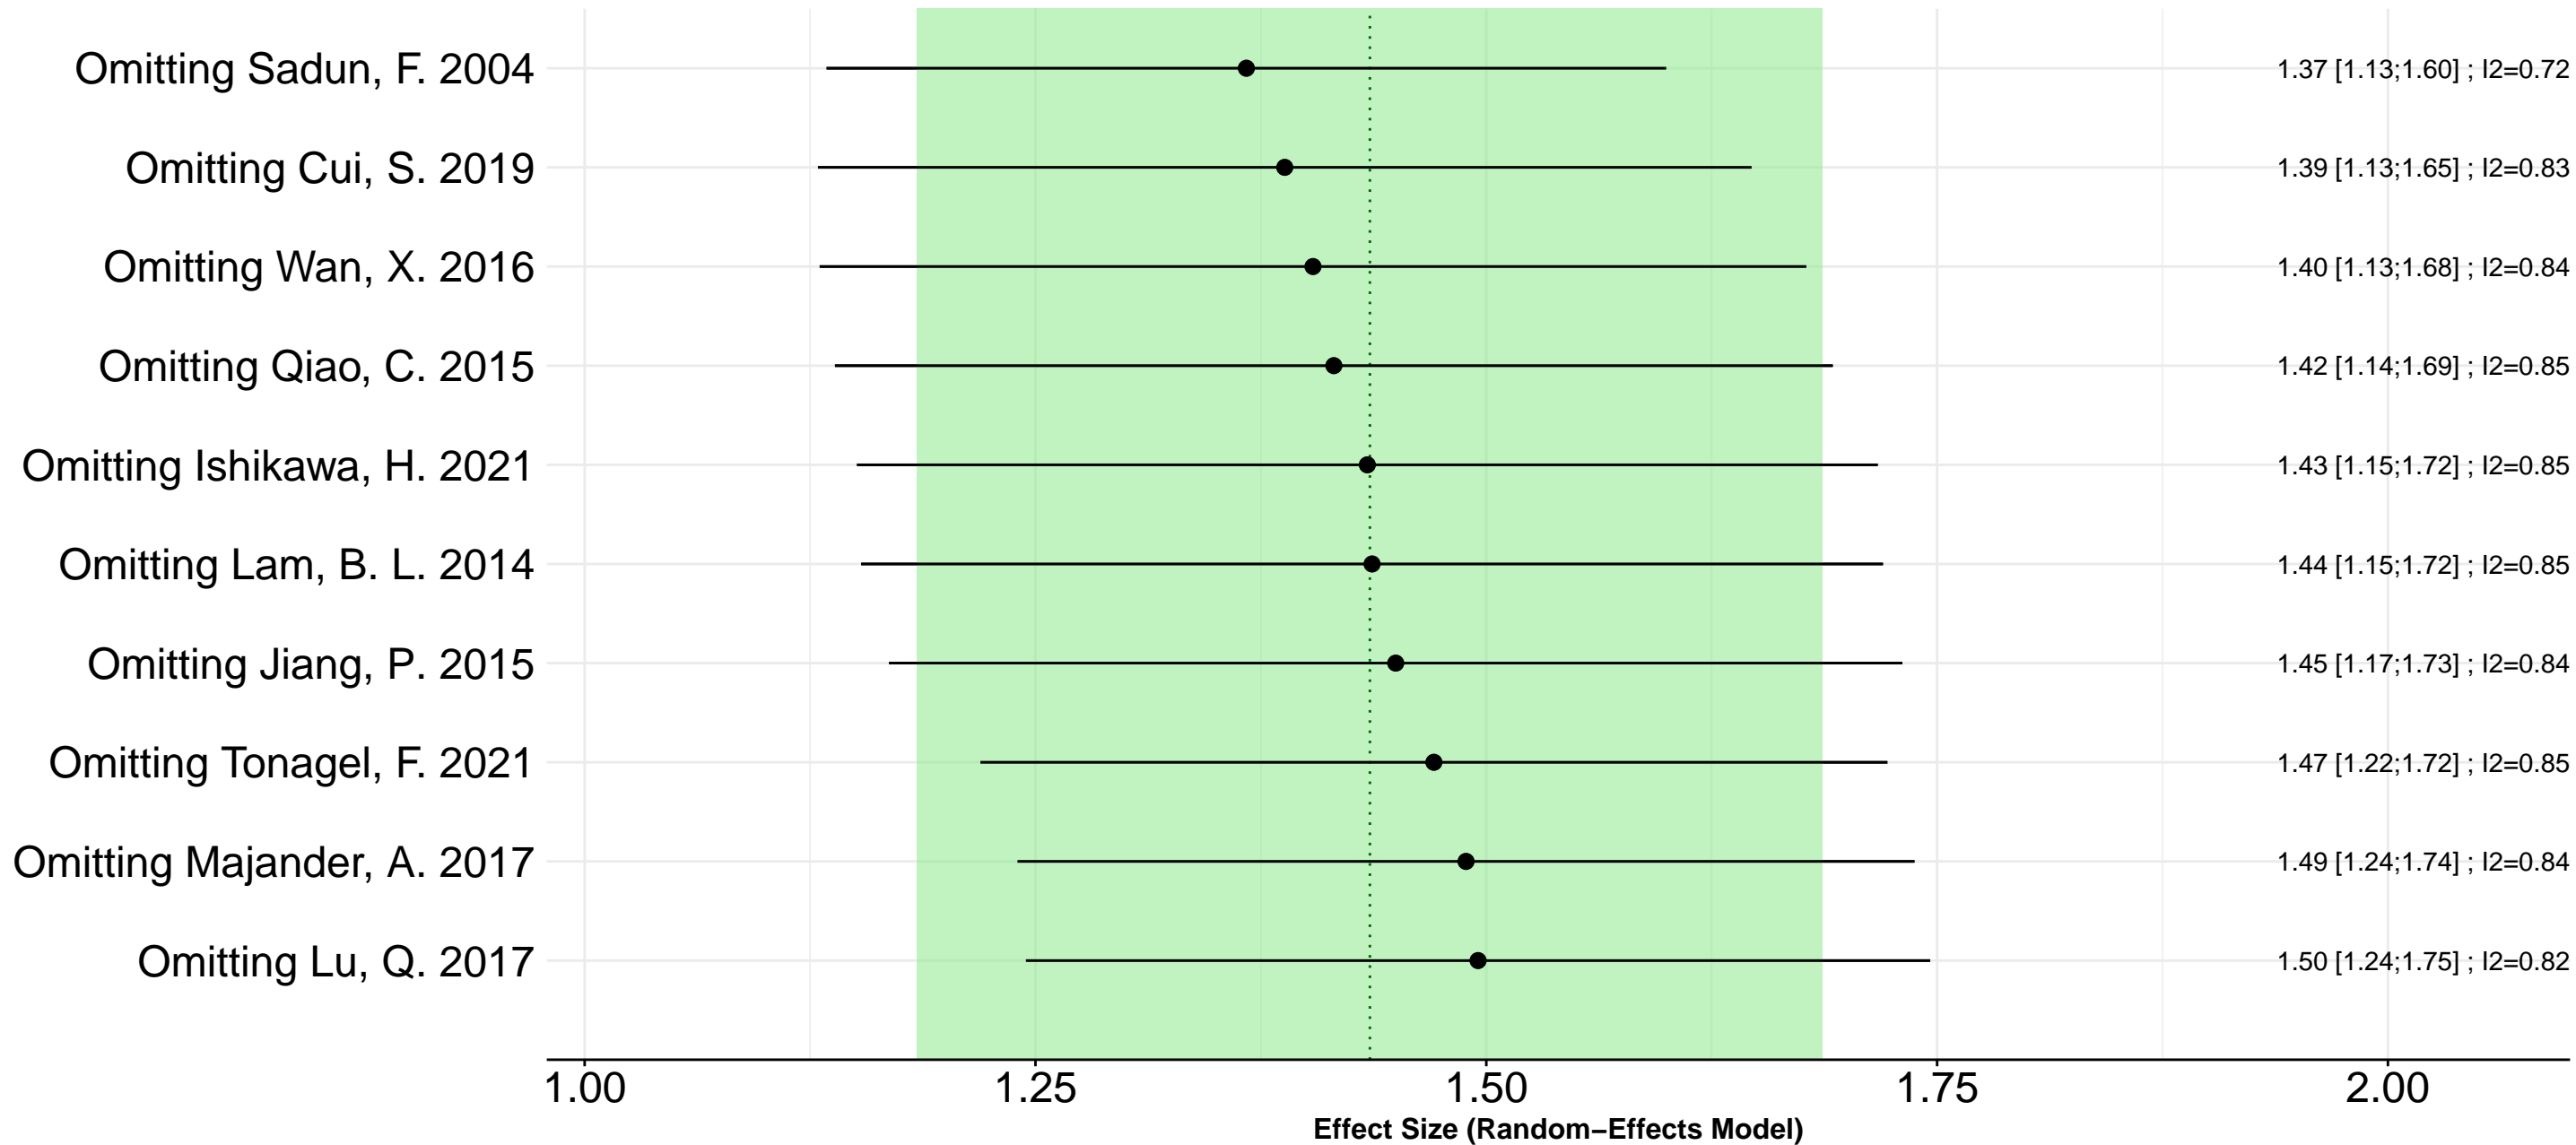

Supplement: f11 [file 1107866.f11.zip]

Sorted by Proportion

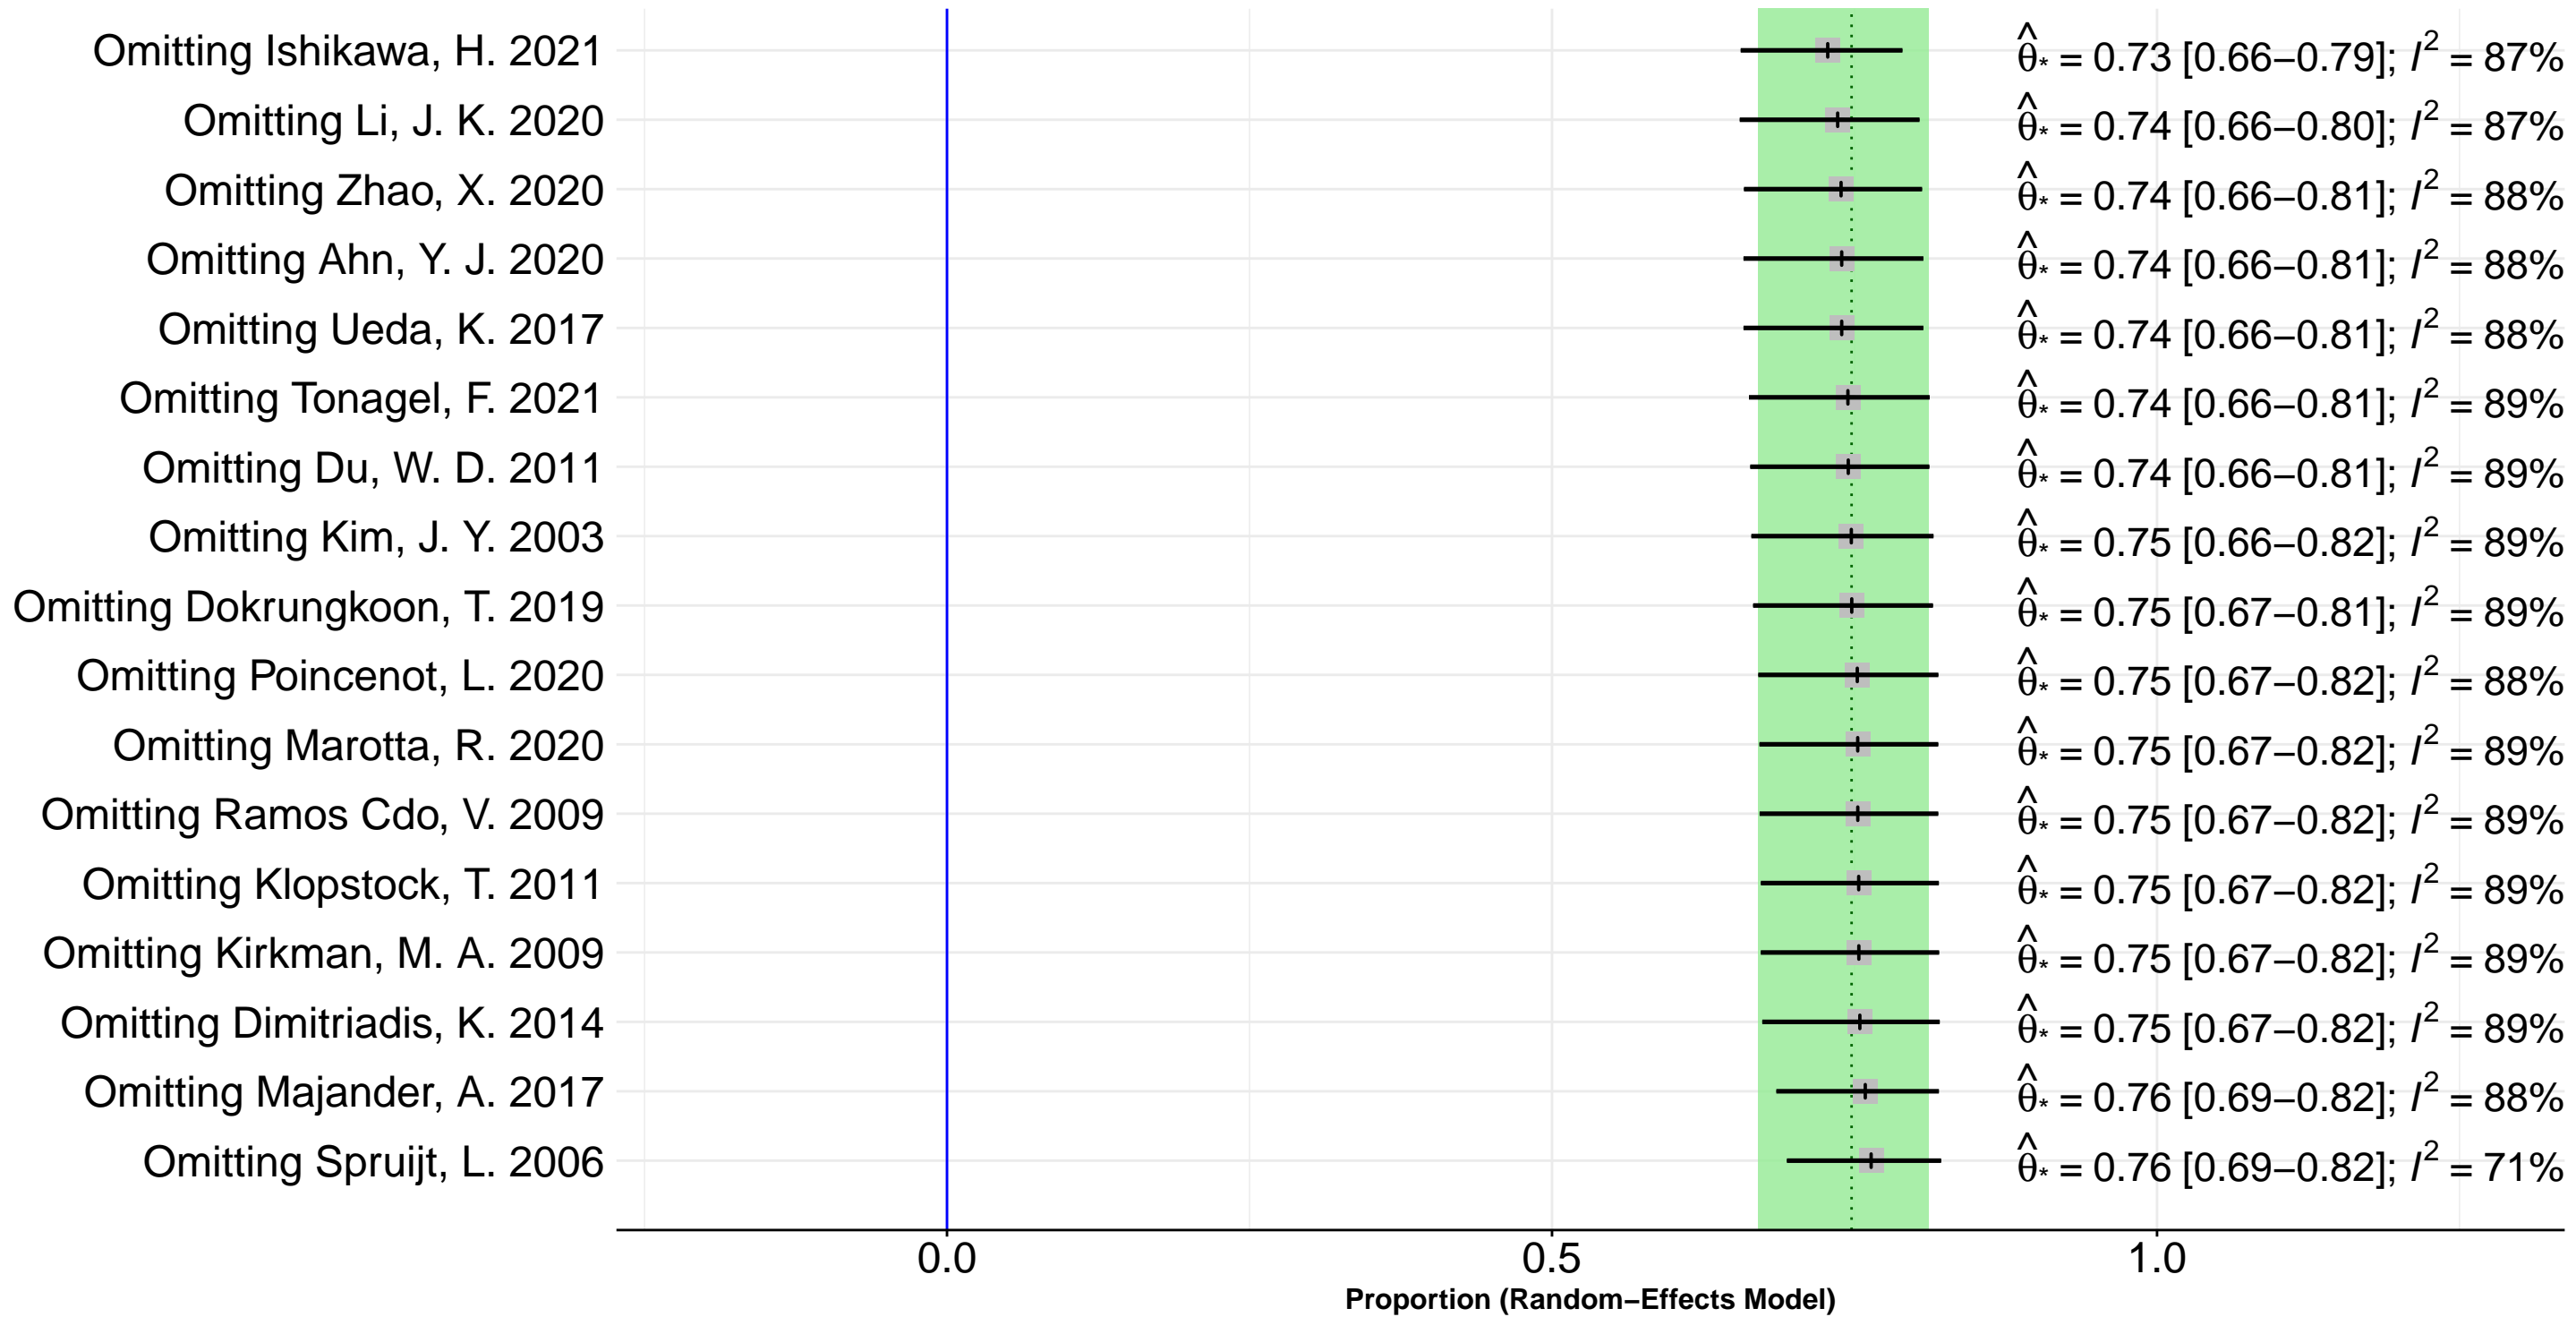

Supplement: f7 [file 1107866.f7.zip]

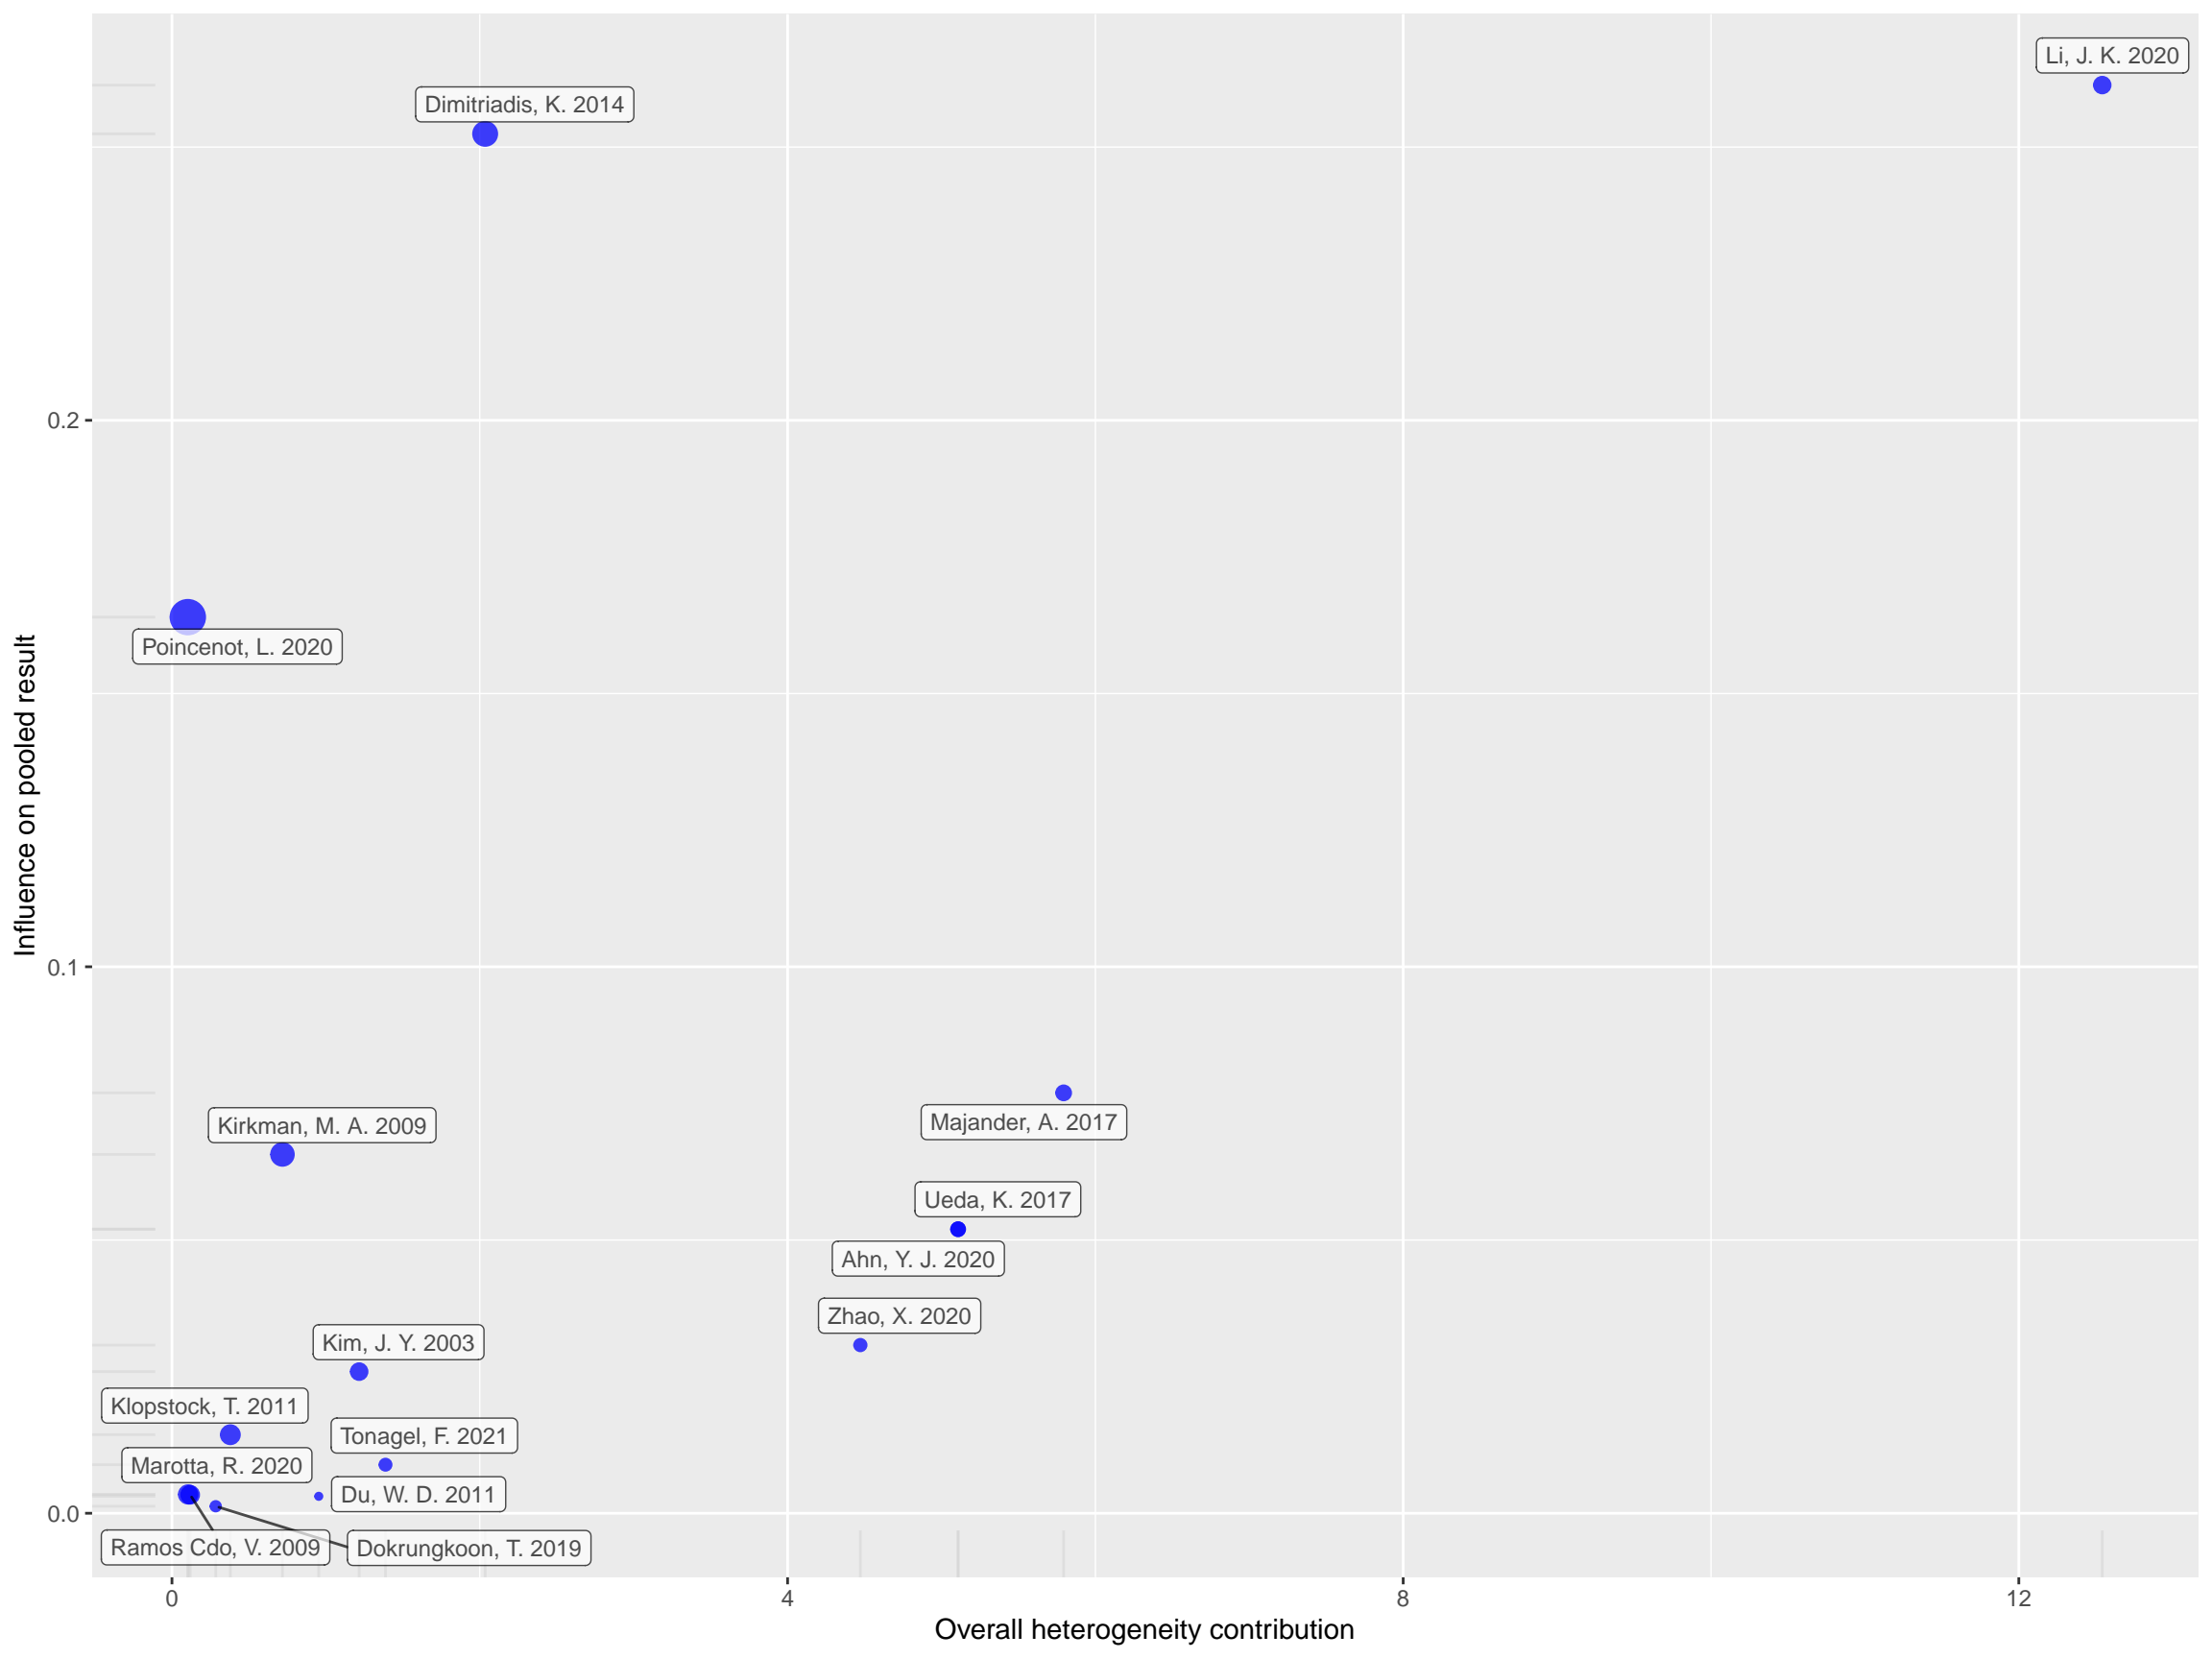

Supplement: f7 [file 1107866.f7.zip]
